# Supplementary material for: Complex formation processes of terminally protected peptides containing two or three histidyl residues. Characterization of the mixed metal complexes of peptides
Source: Royal Society of Chemistry journal article supplement (doi:10.1039/b808323a), 2008-01-01
Supplement: b808323a.pdf [file b808323a.pdf]

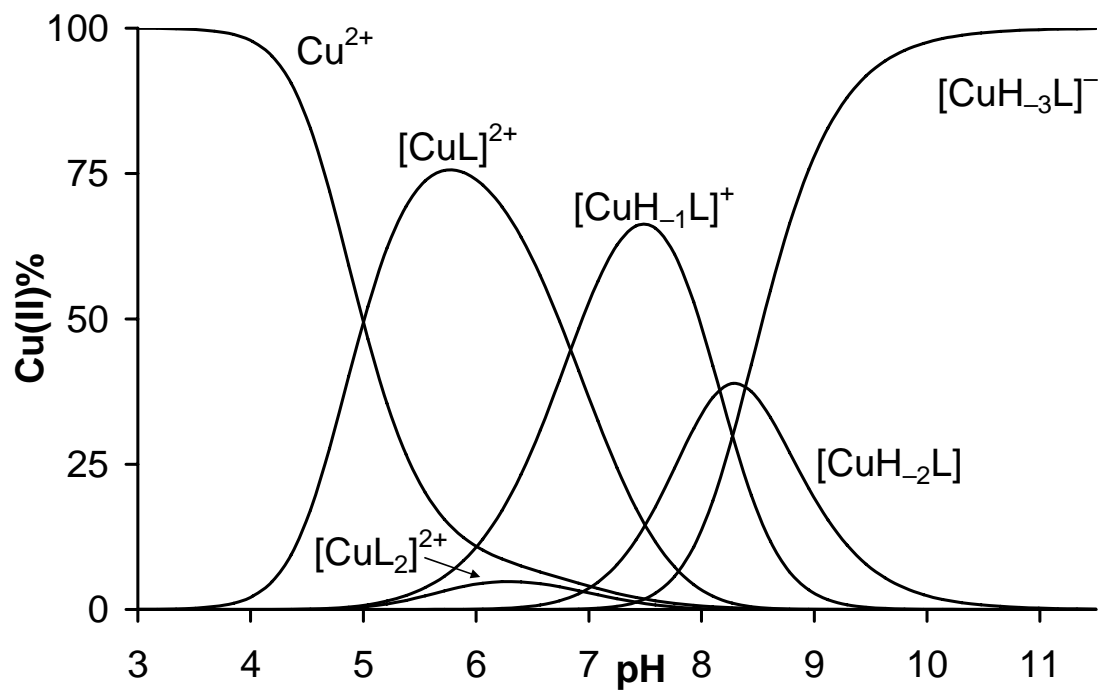

Figure 8

Concentration distribution of the complexes formed in the copper(II)-HVVH system.  
 $[\text{Cu}^{2+}] = 2 \cdot 10^{-3} \text{ mol/dm}^3$ ,  $c_{\text{HVVH}} = 2 \cdot 10^{-3} \text{ mol/dm}^3$

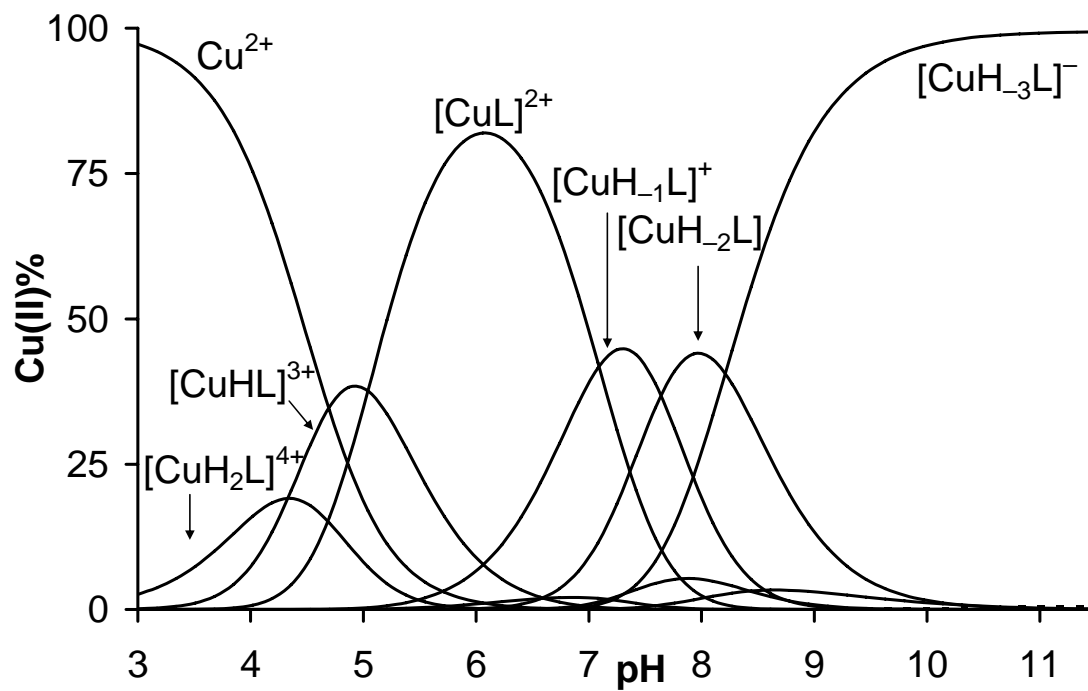

Figure 9  
Concentration distribution of the complexes formed in the copper(II)-HAAHVH system.  
 $[\text{Cu}^{2+}] = 2 \cdot 10^{-3} \text{ mol/dm}^3$ ,  $c_{\text{HAAHVH}} = 2 \cdot 10^{-3} \text{ mol/dm}^3$

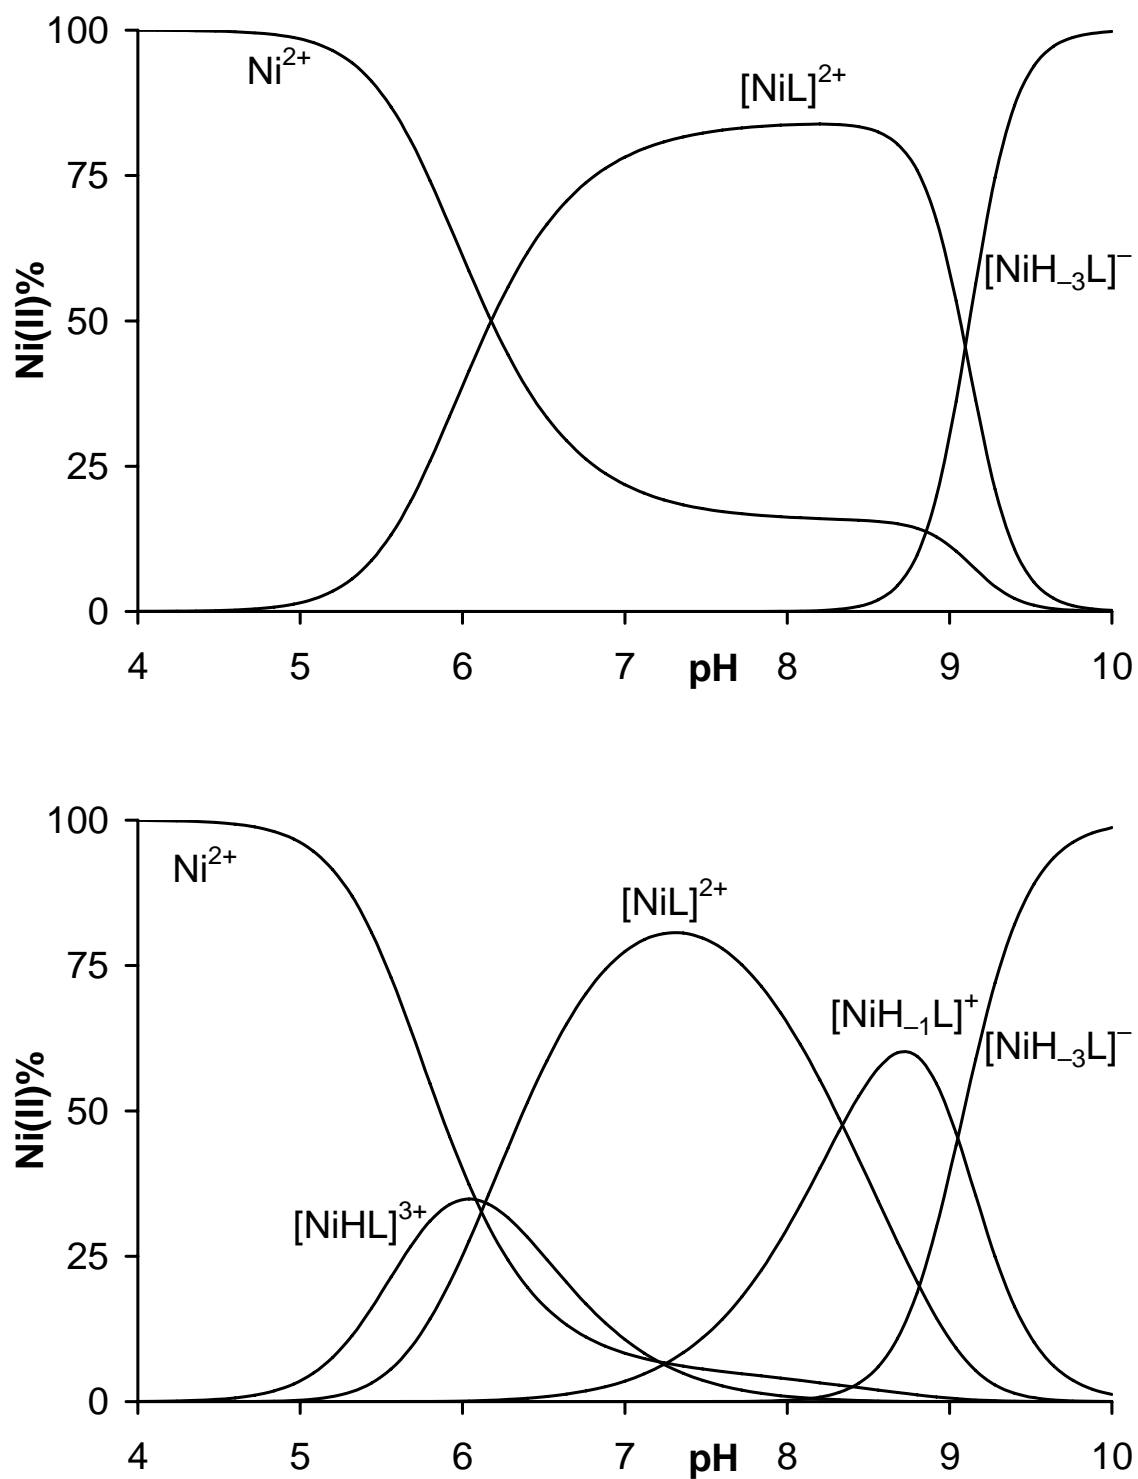

Figure 10.

Concentration distribution of the complexes formed in the nickel(II)-HVVH (a) and HAAHVVH (b) systems.

$[\text{Ni}^{2+}] = 1 \cdot 10^{-3} \text{ mol/dm}^3$ ,  $c_L = 2 \cdot 10^{-3} \text{ mol/dm}^3$
